# Supplementary material
Source: PubMed Central journal article supplement (PMC8711632)
Supplement: NIHMS1754283-supplement-Supplementary_Data_on_Diet_Composition.pdf [file NIHMS1754283-supplement-Supplementary_Data_on_Diet_Composition.pdf]

| Teklad global (GF control diet) |               |           | Labdiet 5001                                 |         |       | RD12077b_WD              |                                   |            |
|---------------------------------|---------------|-----------|----------------------------------------------|---------|-------|--------------------------|-----------------------------------|------------|
| Macronutrients                  | Unit          | Value     | Macronutrients                               | Unit    | Value | Macronutrients           | Unit                              | Value      |
| Crude protein                   | %             | 19        | Protein                                      | %       | 28    | Protein                  | %                                 | 17         |
| Fat (acid hydrolysis)           | %             | 9         | Fat                                          | %       | 13.5  | Fat                      | %                                 | 40         |
| Carbohydrate (available)        | %             | 44.9      | Carbohydrates                                | %       | 58    | Carbohydrate             | %                                 | 43         |
| Crude fiber                     | %             | 2.6       | <b>Minerals</b>                              |         |       | Energy density           | Kcal/g                            | 4.67       |
| Neutral detergent fiber         | %             | 12.1      | Ash                                          | %       | 7     | <b>Class description</b> |                                   |            |
| Ash                             | %             | 5         | Calcium                                      | %       | 0.95  | Protein                  | Lactic casein, 30 mesh            | 195 19.470 |
| Energy density                  | kcal/g (kJ/g) | 3.3(13.8) | Phosphorus                                   | %       | 0.66  | Protein                  | DL methionine                     | 3 0.300    |
| Calories from protein           | %             | 23        | Non-phytate phosphorus                       | %       | 0.39  | Carbohydrate             | Sucrose                           | 350 34.946 |
| Calories from fat               | %             | 22        | Potassium                                    | %       | 1.18  | Carbohydrate             | Lodex 10                          | 100 9.985  |
| Calories from carbohydrate      | %             | 55        | Magnesium                                    | %       | 0.21  | Carbohydrate             | Corn Starch                       | 50 4.992   |
| <b>Minerals</b>                 |               |           | Sulfur                                       | %       | 0.36  | Fiber                    | Solka Floc, FCC200                | 50 4.992   |
| Calcium                         | %             | 0.9       | Sodium                                       | %       | 0.4   | Fat                      | Anhydrous Butter                  | 200 19.969 |
| Phosphorus                      | %             | 0.7       | Chlorine                                     | %       | 0.67  | Fat                      | Corn Oil                          | 10 0.998   |
| Non-phytate phosphorus          | %             | 0.4       | Fluorine                                     | ppm     | 16    | Mineral                  | S10001A                           | 17.5 1.747 |
| Sodium                          | %             | 0.1       | Iron                                         | ppm     | 270   | Mineral                  | Calcium phosphate, dibasic        | 17.5 1.747 |
| Potassium                       | %             | 0.4       | Zinc                                         | ppm     | 79    | Mineral                  | Calcium carbonate, Light, USP     | 4 0.399    |
| Chloride                        | %             | 0.4       | Manganese                                    | ppm     | 70    | Vitamin                  | Choline Bitartrate                | 2 0.200    |
| Magnesium                       | %             | 0.2       | Copper                                       | ppm     | 13    | Vitamin                  | V10001C                           | 1 0.100    |
| Zinc                            | mg/kg         | 60        | Cobalt                                       | ppm     | 0.9   | Anti-oxidant             | Ethoxyquin                        | 0.04 0.004 |
| Manganese                       | mg/kg         | 80        | Iodine                                       | ppm     | 1     | Special                  | Cholesterol, NF                   | 1.5 0.150  |
| Copper                          | mg/kg         | 15        | Chromium                                     | ppm     | 1.2   | <b>S0001A</b>            |                                   | %          |
| Iodine                          | mg/kg         | 6         | Selenium                                     | ppm     | 0.3   | Carbohydrate             | Sucrose, Fine granulated          | 23.606     |
| Iron                            | mg/kg         | 200       | <b>Nutrients</b>                             |         |       | Mineral                  | Potassium citrate, monohydrate    | 44         |
| Selenium                        | mg/kg         | 0.23      | <b>Protein</b>                               | %       | 23.9  | Mineral                  | Sodium Chloride                   | 14.8       |
| <b>Amino acids</b>              |               |           | Arginine                                     | %       | 1.41  | Mineral                  | Potassium sulfate                 | 10.4       |
| Aspartic acid                   | %             | 1.1       | Cystine                                      | %       | 0.31  | Mineral                  | Magnesium oxide, Heavy DC USP     | 4.8        |
| Glutamic acid                   | %             | 3.5       | Glycine                                      | %       | 1.21  | Mineral                  | Ferric citrate                    | 1.2        |
| Alanine                         | %             | 1.2       | Histidine                                    | %       | 0.57  | Mineral                  | Manganese carbonate Hydrate       | 0.7        |
| Glycine                         | %             | 0.7       | Isoleucine                                   | %       | 1.14  | Mineral                  | Zinc carbonate                    | 0.32       |
| Threonine                       | %             | 0.6       | Leucine                                      | %       | 1.83  | Mineral                  | Chromium Potassium sulfate        | 0.11       |
| Proline                         | %             | 1.8       | Lysine                                       | %       | 1.41  | Mineral                  | Copper carbonate                  | 0.06       |
| Serine                          | %             | 0.9       | Methionine                                   | %       | 0.67  | Mineral                  | Potassium iodate                  | 0.002      |
| Leucine                         | %             | 2.3       | Phenylalanine                                | %       | 1.04  | Mineral                  | Sodium selenite                   | 0.002      |
| Isoleucine                      | %             | 0.8       | Tyrosine                                     | %       | 0.71  | <b>V10001C</b>           |                                   |            |
| Valine                          | %             | 0.9       | Threonine                                    | %       | 0.91  | Carbohydrate             | Sucrose, Fine granulated          | 78.4       |
| Phenylalanine                   | %             | 1.1       | Tryptophan                                   | %       | 0.29  | Vitamin                  | Vitamin E acetate, 50%            | 10         |
| Tyrosine                        | %             | 0.5       | Valine                                       | %       | 1.17  | Vitamin                  | Niacin                            | 3          |
| Methionine                      | %             | 0.6       | Serine                                       | %       | 1.19  | Vitamin                  | Biotin, 1%                        | 2          |
| Cystine                         | %             | 0.3       | Aspartic acid                                | %       | 2.81  | Vitamin                  | Pantothenic acid, d, Calcium (B5) | 1.6        |
| Lysine                          | %             | 1.1       | Glutamic acid                                | %       | 4.37  | Vitamin                  | Vitamin D3, 100,000 IU/gm         | 1          |
| Histidine                       | %             | 0.4       | Alanine                                      | %       | 1.43  | Vitamin                  | Vitamin B12, 0.1% mannitol        | 1          |
| Arginine                        | %             | 0.8       | Proline                                      | %       | 1.49  | Vitamin                  | Vitamin A acetate, 500,000 IU/gm  | 0.8        |
| Tryptophan                      | %             | 0.2       | Taurine                                      | %       | 0.02  | Vitamin                  | Pyridoxine HCl (B6)               | 0.7        |
| <b>Vitamins</b>                 |               |           | <b>Fat (ether)</b>                           | %       | 5     | Vitamin                  | Riboflavin (B2)                   | 0.6        |
| Vitamin A                       | IU/g          | 30        | <b>Fat (acid hydrolysis)</b>                 | %       | 5.7   | Vitamin                  | Thiamine HCl (B1)                 | 0.6        |
| Vitamin D3                      | IU/g          | 2         | Cholesterol                                  | ppm     | 200   | Vitamin                  | Folic acid                        | 0.2        |
| Vitamin E                       | IU/kg         | 135       | Linoleic acid                                | %       | 1.22  | Vitamin                  | Menadione Sodium Bisulfite        | 0.08       |
| Vitamin K3 (menadione)          | mg/kg         | 100       | Linolenic acid                               | %       | <0.01 |                          |                                   |            |
| Vitamin B1 (thiamin)            | mg/kg         | 117       | Omega-3 Fatty acids                          | %       | 0.19  |                          |                                   |            |
| Vitamin B2 (riboflavin)         | mg/kg         | 27        | Total saturated fatty acids                  | %       | 1.56  |                          |                                   |            |
| Niacin (nicotinic acid)         | mg/kg         | 120       | Total unsaturated fatty acids                | %       | 1.6   |                          |                                   |            |
| Vitamin B6 (pyridoxine)         | mg/kg         | 26        | <b>Fiber (Crude)</b>                         | %       | 5.1   |                          |                                   |            |
| Pantothenic acid                | mg/kg         | 140       | Neutral detergent fiber                      | %       | 15.6  |                          |                                   |            |
| Vitamin B12 (cyanocobalamin)    | mg/kg         | 0.15      | Acid detergent fiber                         | %       | 6.7   |                          |                                   |            |
| Biotin                          | mg/kg         | 0.9       | <b>Nitrogen-free extract (by difference)</b> | %       | 48.7  |                          |                                   |            |
| Folate                          | mg/kg         | 9         | Starch                                       | %       | 31.9  |                          |                                   |            |
| Choline                         | mg/kg         | 1200      | Glucose                                      | %       | 0.22  |                          |                                   |            |
| <b>Fatty acids</b>              |               |           | Fructose                                     | %       | 0.3   |                          |                                   |            |
| C16:0 Palmitate                 | %             | 0.9       | Sucrose                                      | %       | 3.7   |                          |                                   |            |
| C18:0 Stearate                  | %             | 0.2       | Lactose                                      | %       | 2.01  |                          |                                   |            |
| C18:1w9 Oleic                   | %             | 1.7       |                                              | %       |       |                          |                                   |            |
| C18:2w6 Linoleic                | %             | 3.9       | <b>Total Digestible Nutrients</b>            | %       | 76    |                          |                                   |            |
| C18:3w3 Linolenic               | %             | 0.4       | Gross Energy                                 | kcal/gm | 4.07  |                          |                                   |            |
| Total saturated                 | %             | 1.2       | Physiological fuel value                     | kcal/gm | 3.36  |                          |                                   |            |
| Total monounsaturated           | %             | 1.7       | Metabolizable energy                         | kcal/gm | 3.02  |                          |                                   |            |
| Total polyunsaturated           | %             | 4.4       | <b>Vitamins</b>                              |         |       |                          |                                   |            |
| <b>Other</b>                    |               |           | Carotene                                     | ppm     | 2.3   |                          |                                   |            |
| Cholesterol                     | mg/kg         | -         | Vitamin K (menadione)                        | ppm     | 1.3   |                          |                                   |            |
|                                 |               |           | Thiamin HCl                                  | ppm     | 16    |                          |                                   |            |
|                                 |               |           | Riboflavin                                   | ppm     | 4.5   |                          |                                   |            |
|                                 |               |           | Niacin                                       | ppm     | 120   |                          |                                   |            |
|                                 |               |           | Pantothenic acid                             | ppm     | 24    |                          |                                   |            |
|                                 |               |           | Choline chloride                             | ppm     | 2250  |                          |                                   |            |
|                                 |               |           | Folic acid                                   | ppm     | 7.1   |                          |                                   |            |
|                                 |               |           | Pyridoxine                                   | ppm     | 6     |                          |                                   |            |
|                                 |               |           | Biotin                                       | ppm     | 0.3   |                          |                                   |            |
|                                 |               |           | B12                                          | mcg/kg  | 50    |                          |                                   |            |
|                                 |               |           | Vitamin A                                    | IU/gm   | 15    |                          |                                   |            |
|                                 |               |           | Vitamin D3 (added)                           | IU/gm   | 4.5   |                          |                                   |            |
|                                 |               |           | Vitamin E                                    | IU/kg   | 42    |                          |                                   |            |
|                                 |               |           | Ascorbic acid                                | mg/gm   | -     |                          |                                   |            |
